# Supplementary material
Source: Springer Nature journal article supplement (https://www.springermedizin.de/resource/supplementary/13002_2010_214_MOESM2_ESM.pdf/9627482)

## Consumption of edible insect species by Galo and Nyshi tribe of Arunachal Pradesh

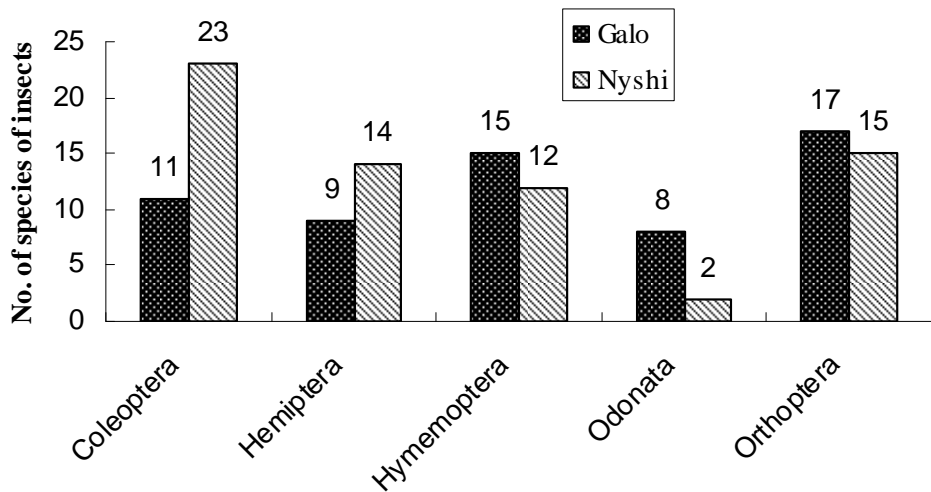

Supplement: MOESM2 [file 9627482]
